# Supplementary figures and images for: Establishment and application of a loop‐mediated isothermal amplification−lateral flow dipstick (LAMP–LFD) method for detecting Clostridium piliforme
Source: PubMed Central journal article supplement — Vet Med Sci. 2023 Nov 3;10(1):e1318. doi: 10.1002/vms3.1318 (PMC10949940; doi:10.1002/vms3.1318), 2023-11-03

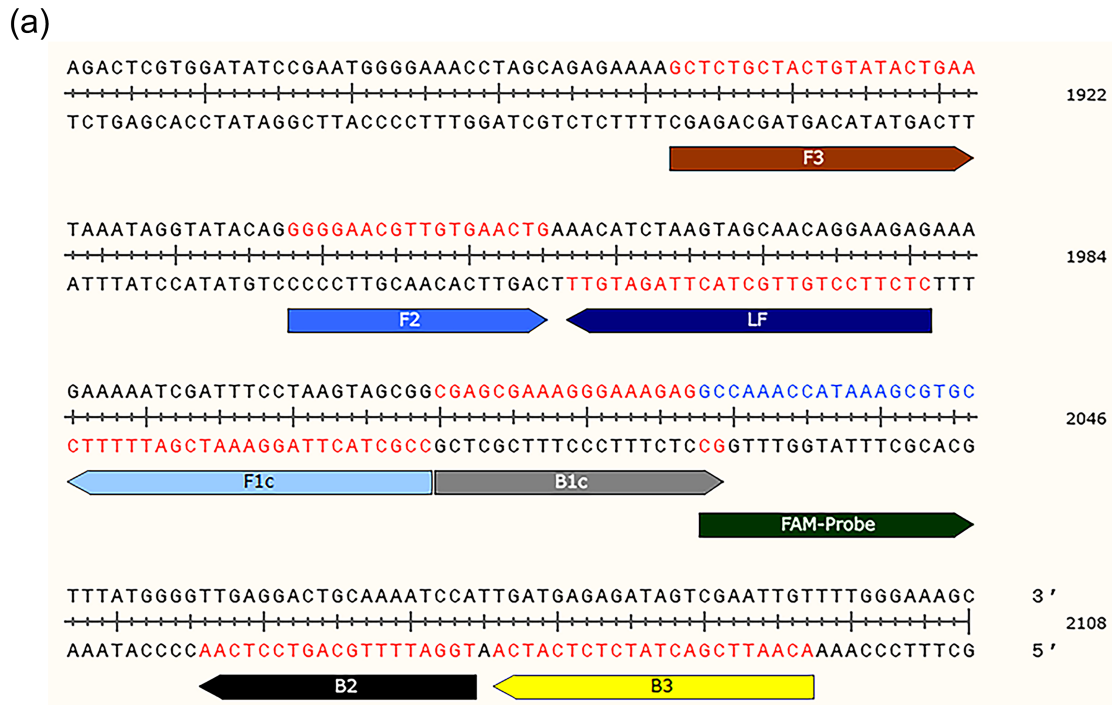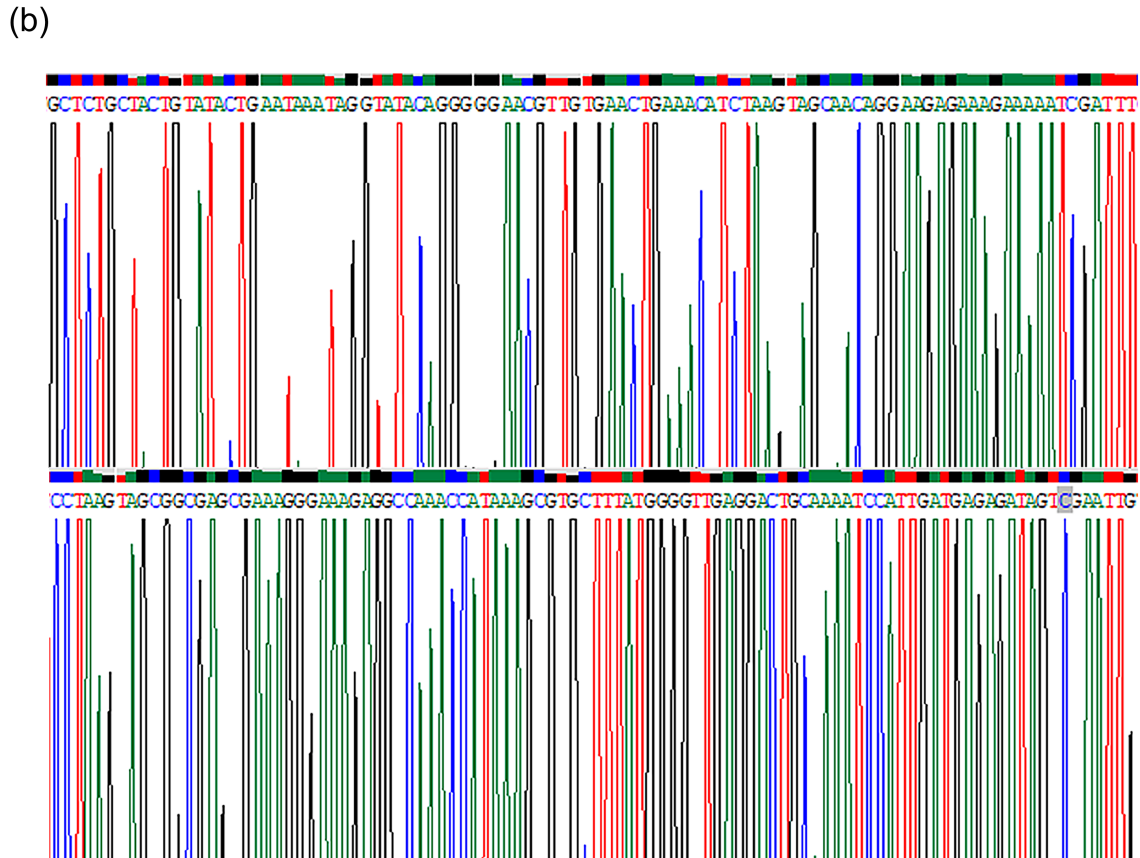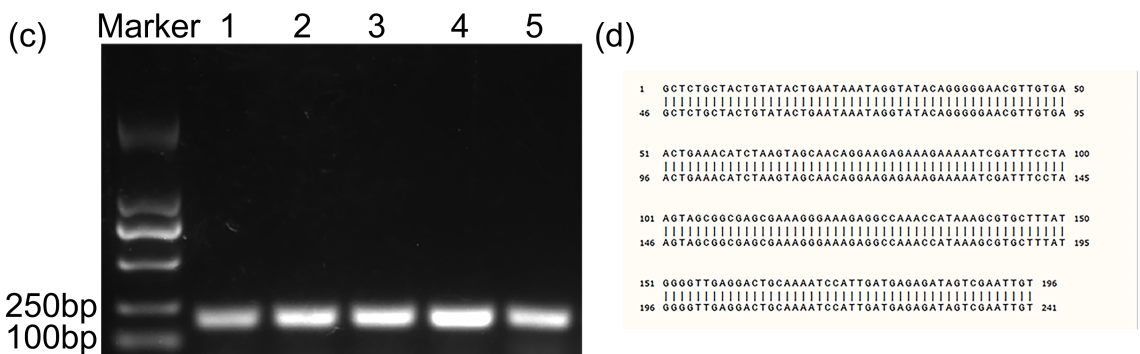

Figure S1

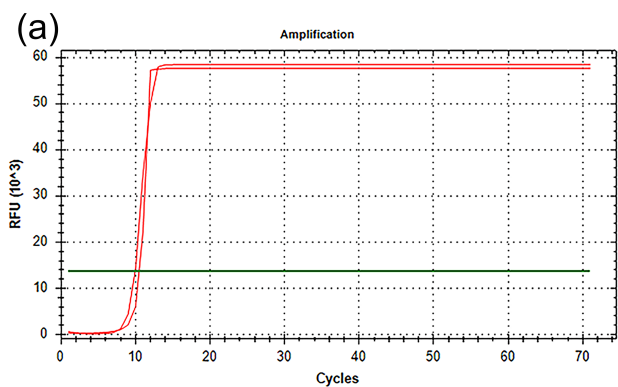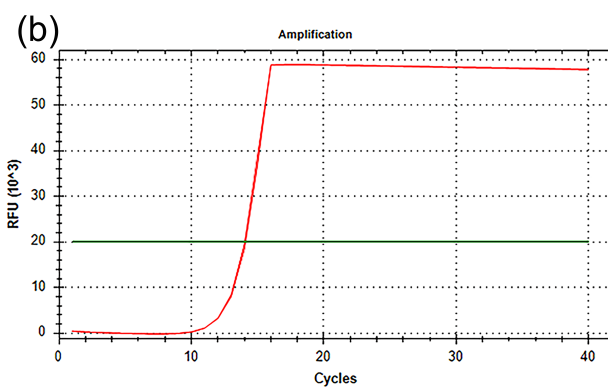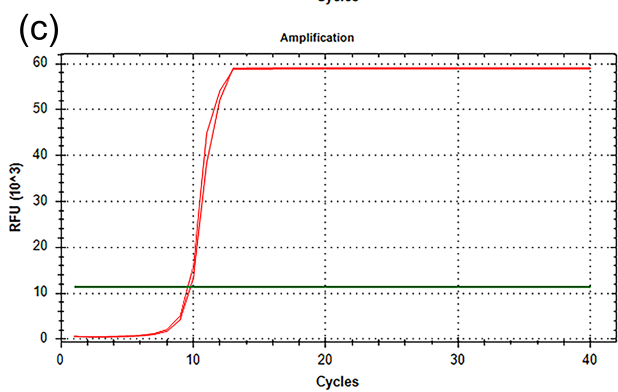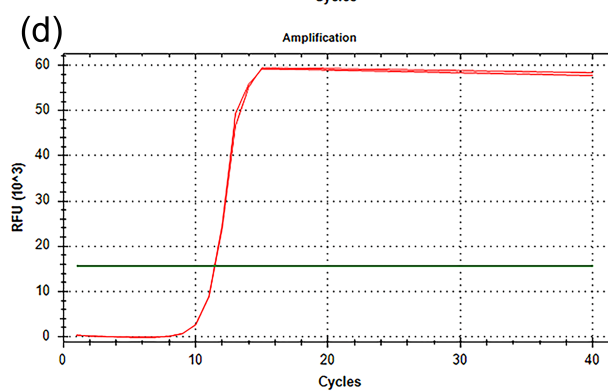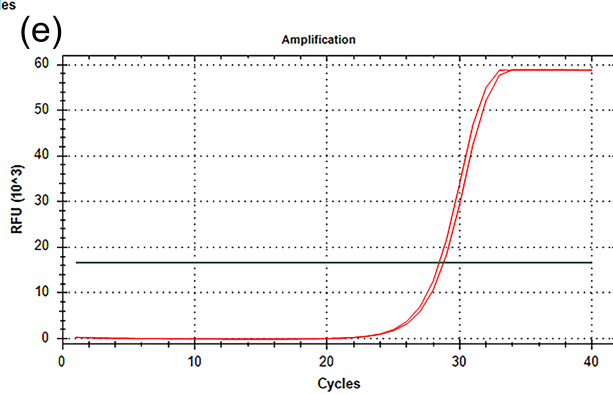

Figure S2

Supplement: VMS3-10-e1318-s001.pdf [file VMS3-10-e1318-s001.pdf]
